# Supplementary material
Source: Springer Nature journal article supplement (https://www.springermedizin.de/resource/supplementary/13024_2011_199_MOESM1_ESM.pdf/9643654)

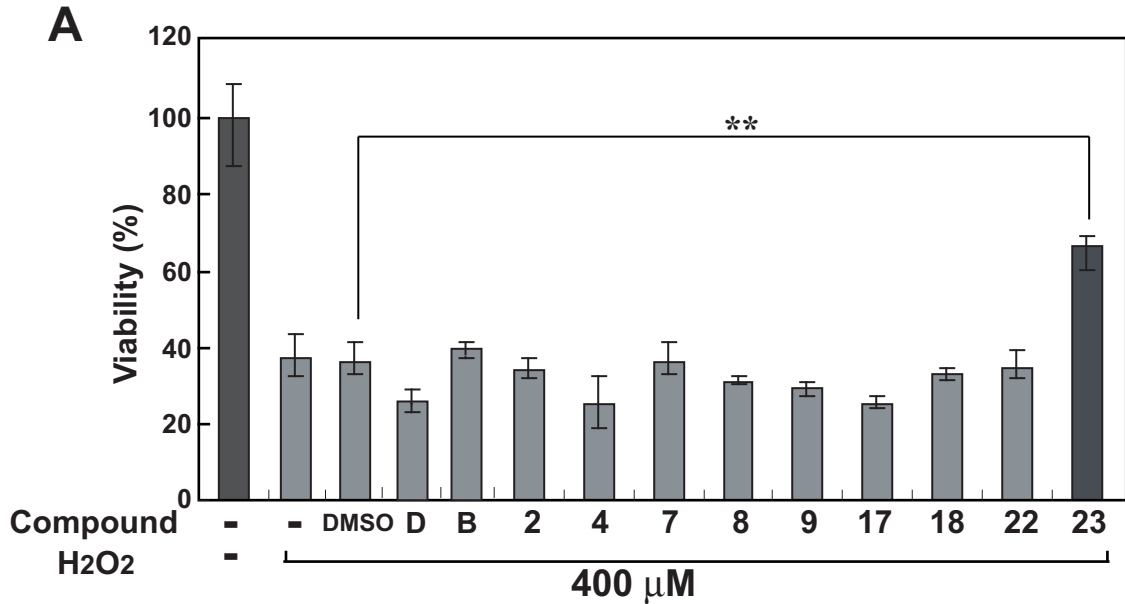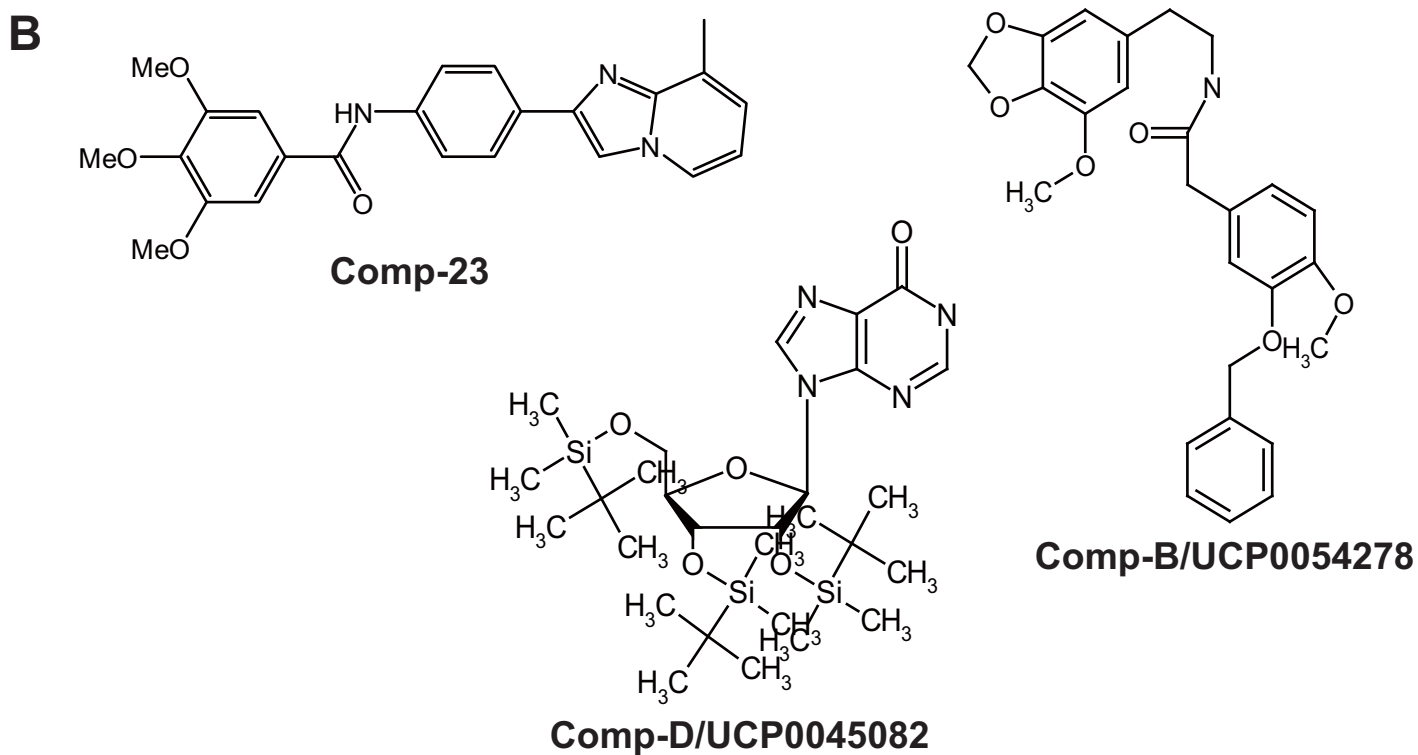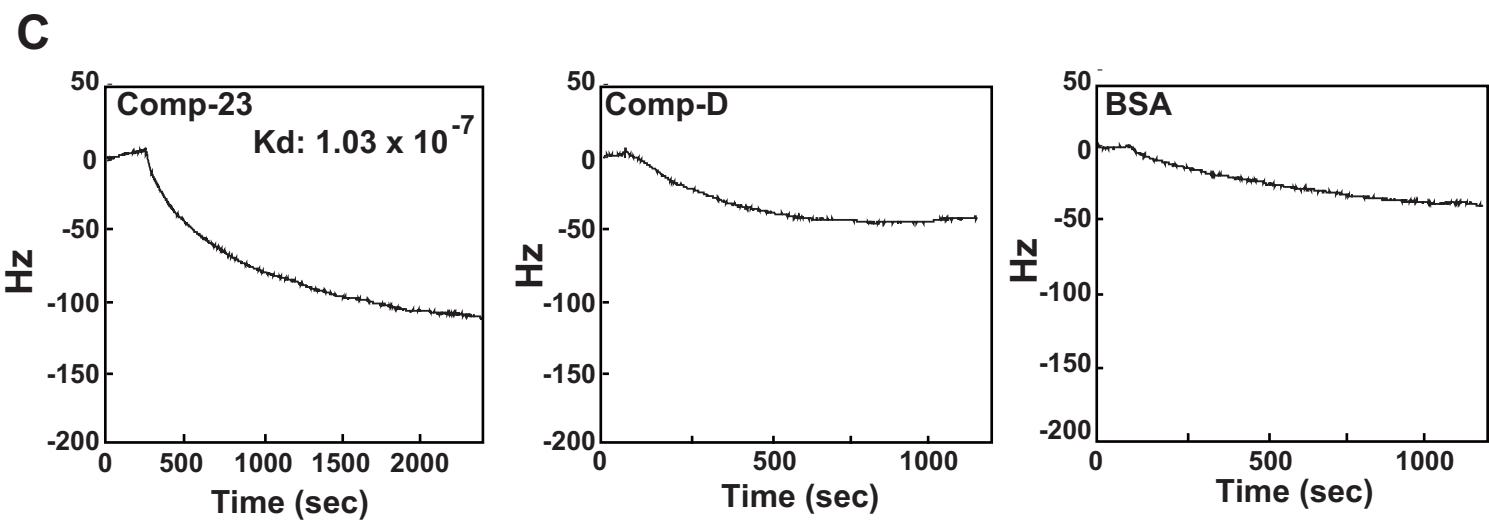

Supplement: MOESM1 [file 9643654]
